# Supplementary material
Source: Springer Nature journal article supplement (https://www.springermedizin.de/resource/supplementary/12990_2009_250_MOESM1_ESM.pdf/9612882)
Supplement: MOESM1 [file 9612882]

**siRNAs specific for rGCH1**

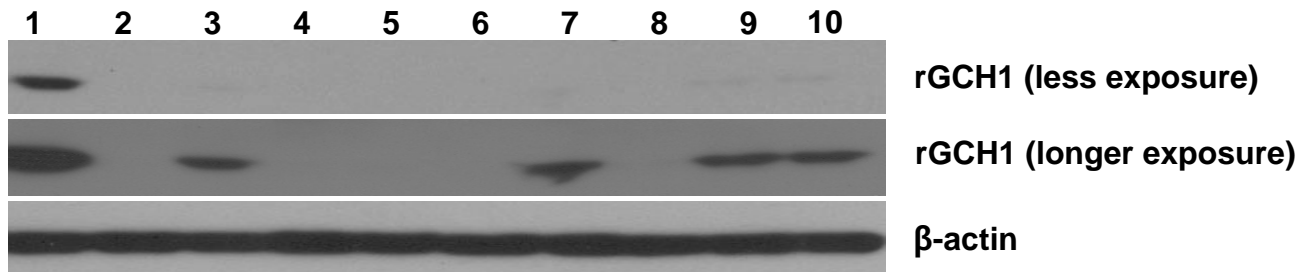

|    | siRNAs             | Target sequence (5'-3')    | Start (nt) | GC (%)      |
|----|--------------------|----------------------------|------------|-------------|
| 1  | scrambled          | AUUCUAUCACUAGCGUGAC        | -          | 42.1        |
| 2  | rGCH1-ex 1         | CCAUGCAGUUCUUCACCA         | 275        | 47.4        |
| 3  | rGCH1-ex 1-2       | AGGGAUACCAGGAGACCA         | 293        | 49.2        |
| 4  | rGCH1-ex 2         | UGUCCUGAACGAUGCUAUA        | 318        | 42.1        |
| 5  | rGCH1-ex 3         | GUCCAUAUUGGUUAUCUUC        | 427        | 36.8        |
| 6  | <i>rGCH1</i> -ex 4 | <i>GUGGAAAUCUACAGUAGAA</i> | <i>487</i> | <i>36.8</i> |
| 7  | rGCH1-ex 5-1       | UUCAAGAACGCCUUACCAA        | 515        | 42.1        |
| 8  | rGCH1-ex 5-2       | UCAAGAACGCCUUACCAA         | 516        | 42.1        |
| 9  | rGCH1-ex 6-1       | UGCAGAAAUGAACAGCAA         | 656        | 36.8        |
| 10 | rGCH1-ex 6-2       | CAGAAAUGAACAGCAAGA         | 658        | 36.8        |
